# Supplementary material for: Short-term anoxic conditioning hormesis boosts antioxidant defenses, lowers oxidative damage following irradiation and enhances male sexual performance in the Caribbean fruit fly, Anastrepha suspensa
Source: Oxford University Press journal article supplement (doi:10.1242/jeb.065631), 2012-05-23
Supplement: jeb065631tables1.pdf [file jeb065631tables1.pdf]

Table S1. Irradiation doses for all treatments were carefully monitored and the target, maximum ( $D_{\max}$ ) and minimum ( $D_{\min}$ ) doses received were always very close to the target dose

| Target dose (Gy) | $D_{\max}$ (Gy) | $D_{\min}$ (Gy) | $D_{\max}/D_{\min}$ |
|------------------|-----------------|-----------------|---------------------|
| 0                | 0               | 0               | 0                   |
| 70               | 76.3            | 72.4            | 1.05                |
| 200              | 226.7           | 223.4           | 1.01                |
| 300              | 323.8           | 313.3           | 1.03                |
| 400              | 429.2           | 429.2           | 1.00                |
